# Supplementary material
Source: HighWire-hosted journal article supplement (https://sit.bmj.com/highwire/filestream/539/field_highwire_adjunct_files/5/bmjsit-2022-000156supp006_data_supplement.pdf)

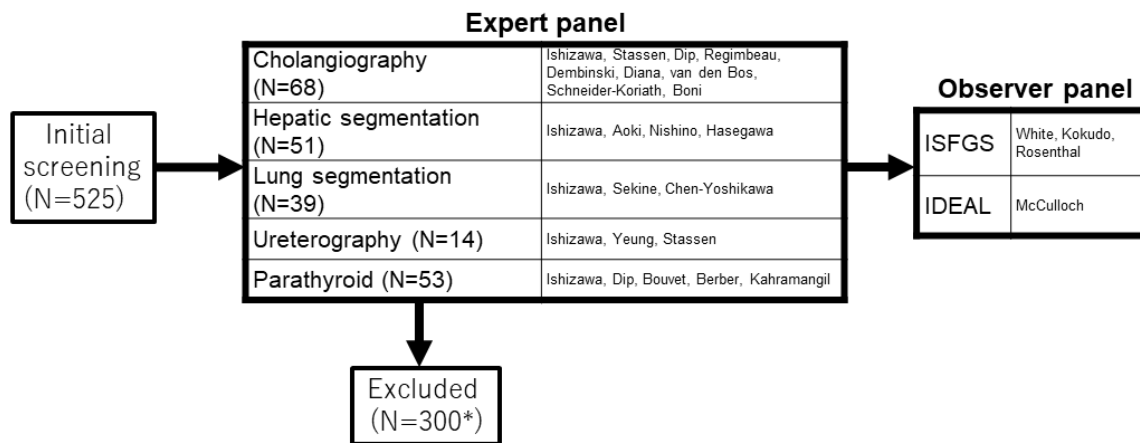

Supplement: bmjsit-2022-000156supp006_data_supplement.pdf [file bmjsit-2022-000156supp006_data_supplement.pdf]
